# Supplementary material for: Highly stable Fe/CeO2 catalyst for the reverse water gas shift reaction in the presence of H2S
Source: Royal Society of Chemistry journal article supplement (doi:10.1039/d3ra01323e), 2023-01-01

Supporting data 1 Thermodynamic stability phases of Fe species at from 25 °C to 700 °C under the simulated reaction atmosphere (CO/H<sub>2</sub>/H<sub>2</sub>S/N<sub>2</sub>=40/40/1/19 molar ratio) condition, calculated by software of HSC Chemistry, version 9.

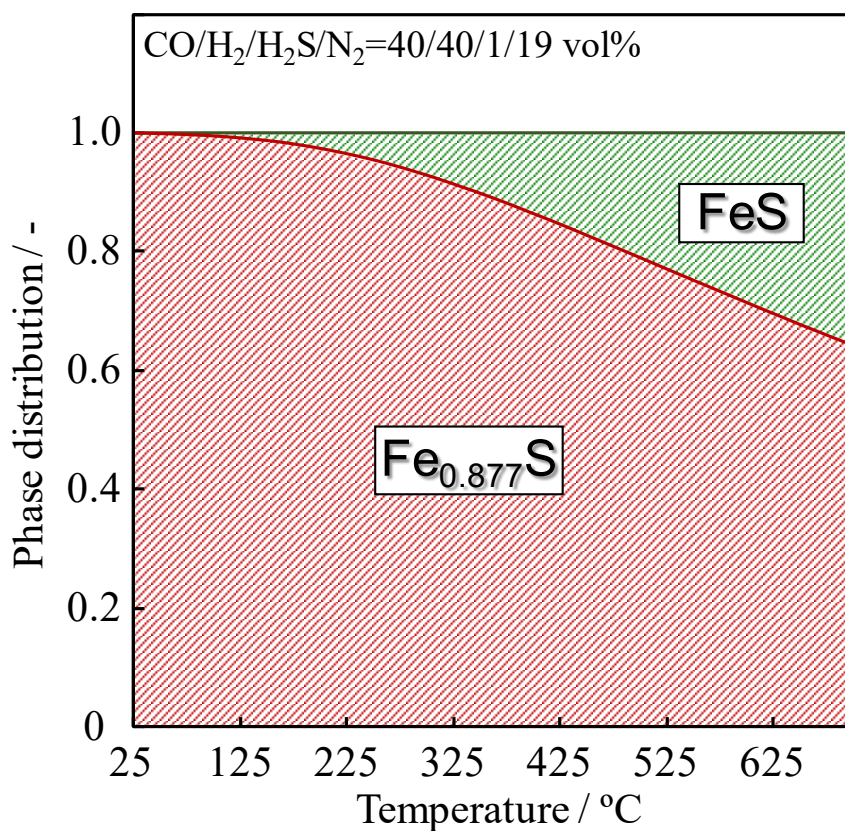

Supplement: d3ra01323e1.pdf [file d3ra01323e1.pdf]
